# Supplementary material for: Risk Factors for Mortality from Acute Lower Respiratory Infections (ALRI) in Children under Five Years of Age in Low and Middle-Income Countries: A Systematic Review and Meta-Analysis of Observational Studies
Source: PubMed Central journal article supplement (PMC4312071; doi:10.1371/journal.pone.0116380), 2015-01-30

## S1 Funnel plots: Funnel plots of risk factors with significant Egger's test

**Figure 1 Funnel plot for prematurity**

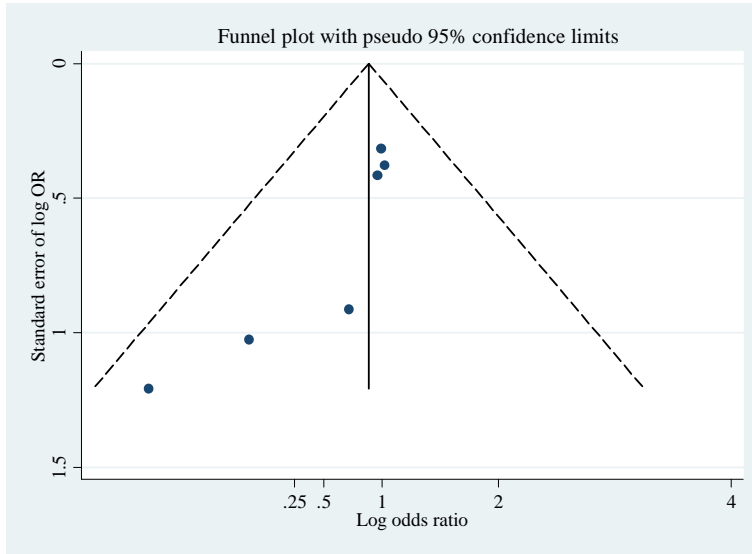

**Figure 2 Funnel plot for severe malnutrition**

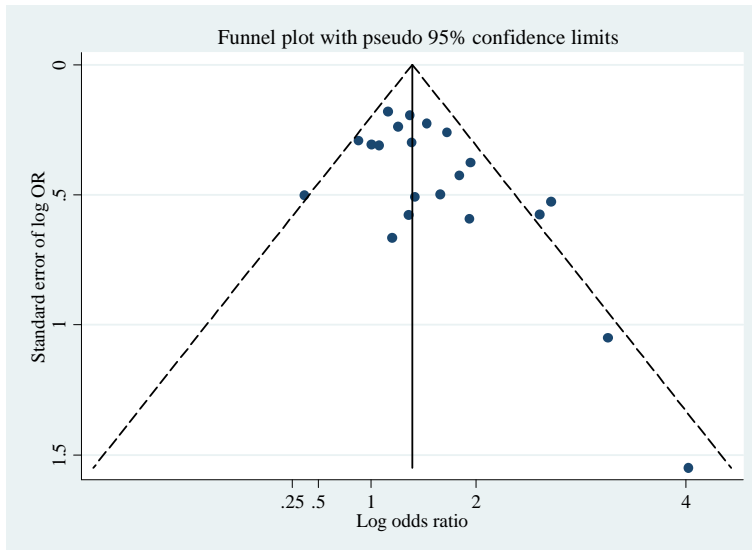

**Figure 3 Funnel plot for comorbidity with chronic diseases**

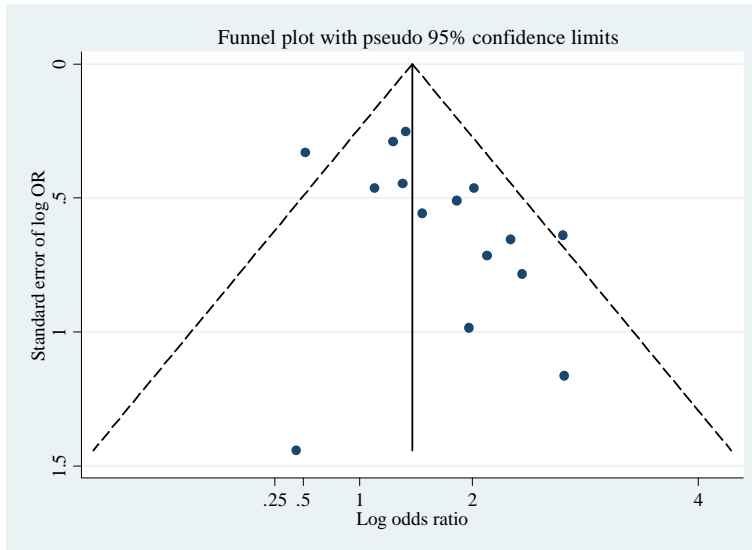

**Figure 4 Funnel plot for measles**

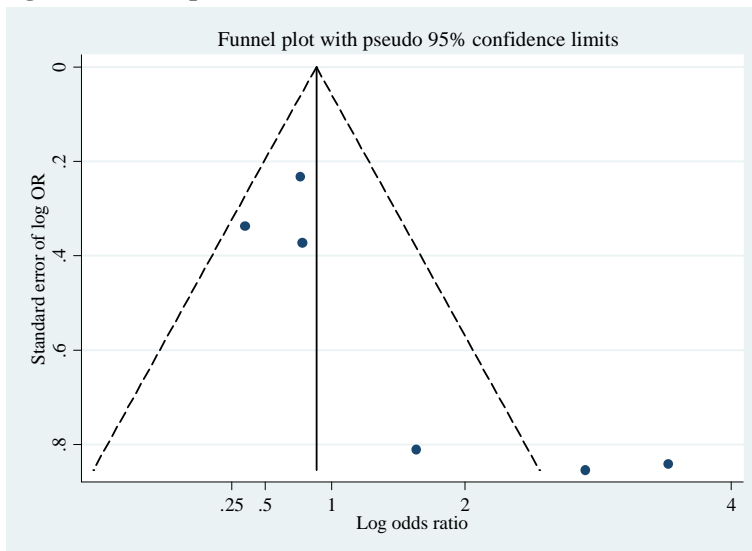

**Figure 5 Funnel plot for severe pneumonia**

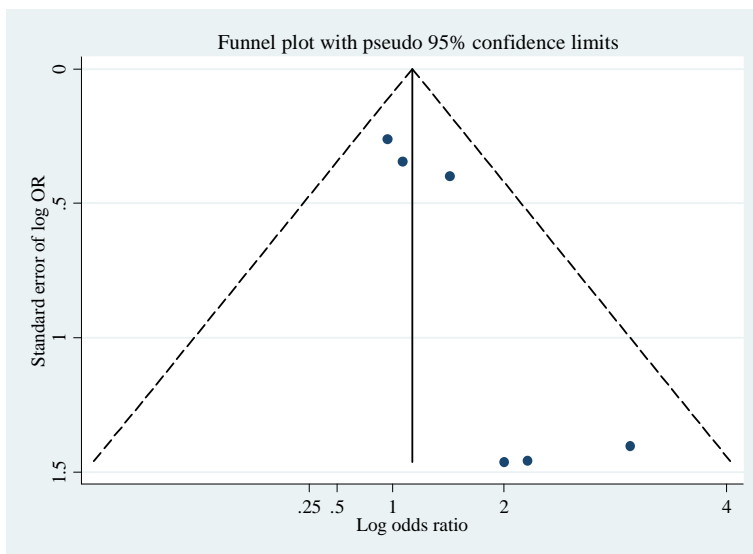

Supplement: pone.0116380.s003.pdf [file pone.0116380.s003.pdf]
