# Supplementary material for: Risk Factors for Mortality from Acute Lower Respiratory Infections (ALRI) in Children under Five Years of Age in Low and Middle-Income Countries: A Systematic Review and Meta-Analysis of Observational Studies
Source: PubMed Central journal article supplement (PMC4312071; doi:10.1371/journal.pone.0116380), 2015-01-30
Supplement: pone.0116380.s004.pdf [file pone.0116380.s004.pdf]

**S1 Table. Characteristics of included studies**

| Author and year of publication | Country                | Period of study | Setting (source population) | Type of study | Diagnostic criteria for ALRI  | Age group (months) | Males (%) | Others characteristics of study population       | ALRI mortality+         | N° of children evaluated | Analyzed risk factors                                        |
|--------------------------------|------------------------|-----------------|-----------------------------|---------------|-------------------------------|--------------------|-----------|--------------------------------------------------|-------------------------|--------------------------|--------------------------------------------------------------|
| Agrawal 1995 [1]               | INDIA                  | 1993            | Hospital (Urban)            | CO            | Clinical                      | 2-60               | 57.5      |                                                  | 11.8                    | 127                      | S, A, M                                                      |
| Arifeen 2001 [2]               | BANGLADESH             | 1993-1995       | Community (Slums)           | CO            | Verbal autopsy                | 0-12               |           |                                                  | 2.9                     | 1677                     | BW, BF, MED                                                  |
| Ayieko 2012 [3]                | KENYA                  | 2007-2008       | Nine Hospitals (Rural)      | CO            | Clinical WHO                  | 6-23 (IQR)         | 53.2      |                                                  | 5.9                     | 3319                     | S, A, Malaria, Diarrhoea/dehydration, SEV                    |
| Bachmann 1996 [4]              | SOUTH AFRICA           | 1992-1993       | Community (Urban and rural) | CO            | Death certificate             | <12                |           |                                                  | 0.25                    | 58022                    | Rural/Urban zone                                             |
| Bahl 2005 [5]                  | INDIA<br>GHANA<br>PERU | 1995-1997       | Community (Slums and rural) | CO            | Clinical or verbal autopsy    | 1-6                |           |                                                  | 0.58/100 children-years | 9200                     | BF                                                           |
| Bahwere 2004 [6]               | DRC                    | 1987-1997       | Hospital (Rural)            | CO            | Clinical and radiological     | not stated         | 52.9      |                                                  | 13.1                    | 848                      | S, A, M, Dehydration                                         |
| Banajeh 1997 [7]               | YEMEN                  | 1995-1996       | Hospital (Rural)            | CO            | Clinical WHO and radiological | 0-59               | 66.9      | All severe ALRI                                  | 9.8                     | 529                      | S, A, M                                                      |
| Banajeh 1998 [8]               | YEMEN                  | 1991-1995       | Hospital (Rural)            | CO            | Clinical WHO and radiological | 0-59               | 63.9      | All severe ALRI                                  | 8.7                     | 2554                     | A                                                            |
| Berkley 2010 [9]               | KENYA                  | 2007-2009       | Hospital (Rural)            | CO            | Clinical WHO                  | 0-144              | 59.0      | All severe ALRI                                  | 3.2                     | 759                      | RSV                                                          |
| Chisti 2011 [10]               | BANGLADESH             | 2007            | Hospital (Urban)            | CO            | Clinical WHO                  | 0-59               |           | All severe ALRI<br>All ALRI and diarrhoea        | 12.1                    | 198                      | A, M, BF, MED, SES                                           |
| Chisti 2013 [11]               | BANGLADESH             | 2011-2012       | PICU (Urban)                | CC            | Radiological                  | 0-59               | 60.7      | All severe ALRI<br>All severe acute malnutrition |                         | 140 (35 ca, 105 live co) | A, S, BF, Diarrhoea/dehydration, Mother's employment, SES, I |

|                        |                          |            |                             |    |                                                |              |      |                             |      |                           |                                                                                    |
|------------------------|--------------------------|------------|-----------------------------|----|------------------------------------------------|--------------|------|-----------------------------|------|---------------------------|------------------------------------------------------------------------------------|
| Collings 1985 [12]     | ZIMBABWE                 | 1982-1983  | Hospital (Urban and rural)  | CO | Clinical                                       | 1-36         | 54.0 |                             | 10.3 | 406                       | A, M, Measles                                                                      |
| Cotes 2012 [13]        | COLOMBIA                 | 2000-2006  | Three Hospitals (Urban)     | CO | ICD-10 discharge codes for ALRI                | 0-23         | 53.6 | ALRI only during flu season | 3.5  | 535                       | Underlying diseases                                                                |
| De Francisco 1993 [14] | GAMBIA                   | not stated | Community (Rural)           | CC | Verbal autopsy                                 | 0-23         |      |                             |      | 248 (124 ca, 124 live co) | M,BF, MED, CW, Second-hand smoke, Indoor pollution, I, Preventive health practices |
| Deivanayagam 1992 [15] | INDIA                    | 1989       | Hospital (Urban)            | CC | Clinical WHO and radiological                  | 1-132        |      |                             |      | 210 (70 ca, 140 live co)  | A, M, Underlying diseases, SEV                                                     |
| Delpont 2002 [16]      | SOUTH AFRICA             | 1994-1995  | PICU (Urban)                | CO | Clinical and radiological                      | 0-60         |      | All severe ALRI             | 30.4 | 23                        | A, Prematurity, HIV, RSV                                                           |
| Demers 2000 [17]       | CENTRAL AFRICAN REPUBLIC | 1996-1997  | Hospital (Urban)            | CO | Clinical WHO                                   | 0-60         | 48.3 |                             | 12.4 | 395                       | A, Birth order, BW, M, MAG, SEV                                                    |
| Djelantik 2003 [18]    | INDONESIA                | 1999-2001  | Three Hospitals (Rural)     | CO | Clinical WHO                                   | 0-24         |      | All severe ALRI             | 11.6 | 4351                      | S, A, M, RSV                                                                       |
| Duke 2001 [19]         | PNG                      | 1998-1999  | Hospital (Rural)            | CO | Clinical WHO combined with PNG guidelines      | 1-59         |      | All severe ALRI             | 6.5  | 648                       | M, Measles                                                                         |
| El Kholly 2013 [20]    | EGYPT                    | 2010-2011  | Hospital (Urban)            | CO | Clinical                                       | 0-60         | 57.7 | All severe RSV ALRI         | 5.0  | 240                       | S, A, Underlying diseases                                                          |
| Espinal 1996 [21]      | DOMINICAN REPUBLIC       | 1996       | Community (Urban and rural) | CO | Verbal autopsy                                 | <12          |      |                             | 0.7  | 3715                      | Rural/Urban zone                                                                   |
| Fagbule 1990 [22]      | NIGERIA                  | 1985-1986  | Hospital (Urban)            | CO | Clinical                                       | < 60 (9%>60) | 62.4 |                             | 9.7  | 330                       | A, Underlying diseases, Measles, SEV                                               |
| Ferreira 2013 [23]     | BRAZIL                   | 1996-2000  | Hospital (Urban)            | CO | Clinical WHO and radiological                  | 1-144        | 57.6 |                             | 5.8  | 413                       | S, A, M, SEV                                                                       |
| Ghani 2012 [24]        | SOUTH AFRICA             | 2009       | PICU (Urban)                | CO | Clinical and laboratory proven viral infection | 2-13 (IQR)   | 49.0 | All severe viral ALRI       | 11.4 | 175                       | S, A, M, HIV, RSV, PcP                                                             |

|                                                             |              |            |                                 |    |                                                        |                |      |                                   |      |                           |                                                                                                          |
|-------------------------------------------------------------|--------------|------------|---------------------------------|----|--------------------------------------------------------|----------------|------|-----------------------------------|------|---------------------------|----------------------------------------------------------------------------------------------------------|
| Graham 2000 [25]                                            | MALAWI       | 1996       | Hospital (Urban)                | CO | Clinical WHO and radiological                          | 2-59 (IQR)     | 53.3 | All severe ALRI >50% HIV infected | 22.0 | 150                       | A, HIV, PcP                                                                                              |
| Graham 2011 [26] (includes Ramakrishna 2012 [27])           | MALAWI       | 2005-2006  | Hospital (Urban)                | CO | Clinical WHO                                           | 2-156 (12%>60) | 54.1 | All severe ALRI >50% HIV infected | 10.1 | 327                       | A, M, HIV, PcP, SEV                                                                                      |
| Hildenwall 2009 [28]                                        | UGANDA       | 2006       | Hospital (Urban)                | CO | Clinical WHO and radiological                          | 2-59           | 47.9 | All severe ALRI                   | 12.9 | 140                       | SEV                                                                                                      |
| Hoque 1999 [29]                                             | BANGLADESH   | 1992-1994  | Community (Rural)               | CC | Verbal autopsy                                         | 1-59           |      |                                   |      | 304 (152 ca, 152 live co) | BF, MED, Sanitation, CW, I                                                                               |
| Hussain 1999 [30]                                           | BANGLADESH   | 1992       | Community (Slums)               | CO | Verbal autopsy                                         | 0-59           | 51.2 |                                   | 1.0  | 2351                      | S, A                                                                                                     |
| Johnson 1992[31] (includes Johnson 'Host Factors' 1992[32]) | NIGERIA      | 1985-1986  | Hospital (Urban)                | CO | Clinical                                               | 0-59           | 53.4 |                                   | 7.8  | 103                       | S, A, M, BF, MED, SES, CW, Second-hand smoke, Indoor pollution, I, Measles                               |
| Johnson 2008 [33]                                           | NIGERIA      | not stated | Hospital (Urban)                | CO | Clinical and radiological Denny and Clyde defined ALRI | 0-59           | 54.8 |                                   | 10.8 | 323                       | A, S, Birth order, M, MED, SES, CW, Second-hand smoke, Indoor pollution, Seasonality, I, Preconsultation |
| Kitchin 2011 [34]                                           | SOUTH AFRICA | 2007       | Hospital (Ward+PICU) (Urban)    | CO | Clinical WHO and radiological                          | not stated     | 53.0 | All severe ALRI >50% HIV infected | 25   | 132                       | HIV                                                                                                      |
| Lehmann 1996 [35]                                           | PNG          | 1979-1984  | Community (Rural)               | CO | Verbal autopsy                                         | 0-12           | 49.4 |                                   | 3.3  | 1711                      | BW                                                                                                       |
| Lupisan 2007 [36]                                           | PHILIPPINES  | 1994-2000  | Hospital (Rural)                | CO | Clinical WHO                                           | 2-59           | 58.3 | All severe ALRI                   | 2.4  | 1249                      | S, A, M                                                                                                  |
| Mahdi 2000 [37]                                             | SOUTH AFRICA | 1997-1998  | Hospital (Urban)                | CO | Clinical WHO and/or p02<90%                            | 2-60           |      | All severe ALRI                   | 7.3  | 1165                      | M, HIV                                                                                                   |
| Man 1998 [38]                                               | GAMBIA       | 1993-1995  | Two Hospitals (Urban and rural) | CO | Clinical                                               | 0-60           |      |                                   | 7.0  | 2193                      | M                                                                                                        |

|                               |              |            |                              |    |                                                    |               |      |                                   |      |                             |                                                                                           |
|-------------------------------|--------------|------------|------------------------------|----|----------------------------------------------------|---------------|------|-----------------------------------|------|-----------------------------|-------------------------------------------------------------------------------------------|
| Mathur 2002 [39]              | INDIA        | not stated | PICU (Urban)                 | CO | Clinical or Radiological                           | <1            |      | All newborns                      | 31.1 | 103                         | A, Prematurity, BW                                                                        |
| Mc Nally 2007 [40]            | SOUTH AFRICA | 2001-2002  | Hospital (Urban)             | CO | Clinical WHO                                       | 1-59          | 54.7 | All severe ALRI >50% HIV infected | 15.1 | 358                         | A, M, HIV, Underlying diseases, Diarrhoea, Preconsultation, SEV                           |
| Millán 1999 [41]              | CHILE        | 1995       | Community (Urban)            | CC | ICD-9 discharge codes of ALRI                      | <12           | 53.8 |                                   |      | 231 (113 ca, 118 live co)   | S, Prematurity, Birth order, BW, BF, Underlying diseases, MED, SES, CW, Second-hand smoke |
| Morrow 2010 [42]              | SOUTH AFRICA | 2006-2008  | Hospital (Ward+PICU) (Urban) | CO | Clinical WHO and p02 < 90%                         | 2.1-4.6 (IQR) | 45.5 | All severe ALRI >50% HIV infected | 25.2 | 202                         | HIV, PcP                                                                                  |
| Mtango 1992 [43]              | TANZANIA     | 1986-1987  | Community (Rural)            | CC | Verbal autopsy and/or medical record               | <60           | 49.1 |                                   |      | 1314 (154 ca, 1160 live co) | S, A, BF, MAG, MED, Sanitation, CW, Second-hand smoke, Indoor pollution                   |
| Murtagh 2009 [44]             | ARGENTINA    | 1998-2005  | Hospital (Urban)             | CO | Clinical and laboratory proven viral infection     | <72           | 61.5 | All Adenovirus ALRI               | 12.8 | 405                         | Measles                                                                                   |
| Naheed 2009 [45]              | BANGLADESH   | 2004-2007  | Seven Hospitals              | CO | Clinical WHO                                       | 2-59          | 64.0 |                                   | 3.6  | 4155                        | A, M, Preconsultation, SEV                                                                |
| Nantanda 2008 [46]            | UGANDA       | 2005-2006  | Hospital (Urban)             | CO | Clinical WHO                                       | 2-59          |      | All severe ALRI                   | 15.3 | 157                         | A, M, HIV, I, SEV                                                                         |
| Nascimento-Carvalho 2002 [47] | BRAZIL       | 1997-1999  | Two hospitals (Urban)        | CO | Clinical WHO or radiological                       | 0-59          | 54.1 |                                   | 1.2  | 1762                        | A, M, Underlying diseases                                                                 |
| Nathoo 1993 [48]              | ZIMBABWE     | 1989-1990  | Hospital (Urban and rural)   | CO | Clinical WHO                                       | 1-60          | 55.7 |                                   | 14.8 | 704                         | A, BW, M, HIV, Diarrhoea, Previous ALRI, SEV                                              |
| Niobey 1992 [49]              | BRAZIL       | 1986-1987  | Community (Urban)            | CC | ICD-9 death certificate for ALRI                   | 1-12          |      |                                   |      | 478 (255 ca, 223 live co)   | Birth order, BW, BF, Previous ALRI, MED, SES, CW, Second-hand smoke, I                    |
| O'Callaghan 2011 [50]         | MOZAMBIQUE   | 2006-2007  | Hospital (Rural)             | CO | Clinical WHO and laboratory proven viral infection | <60           | 63.0 | All severe viral ALRI             | 9.2  | 359                         | S, A, HIV, Malaria, Seasonality, RSV                                                      |

|                        |                                  |            |                                    |                  |                                                        |                 |      |                                                |                                    |                                                |                                                                                            |
|------------------------|----------------------------------|------------|------------------------------------|------------------|--------------------------------------------------------|-----------------|------|------------------------------------------------|------------------------------------|------------------------------------------------|--------------------------------------------------------------------------------------------|
| Onyango 1993 [51]      | KENYA                            | 1989       | Hospital (Urban)                   | CO               | Clinical                                               | 0-36            |      |                                                | 10                                 | 256                                            | A                                                                                          |
| Pérez 2007 [52]        | CHILE                            | 2004       | Hospital (Urban)                   | CO               | Laboratory proven viral infection                      | 1-40 (IQR)      | 68.4 | All Adenovirus ALRI                            | 8.8                                | 57                                             | Underlying diseases, Previous ALRI                                                         |
| Post 1992 [53]         | BRAZIL                           | 1986-1987  | Hospitals (Urban)                  | CC               | Hospital records                                       | <12             |      |                                                |                                    | 298 (152 ca 146 live co)                       | Prematurity, BW, M, BF, MED, SES, CW, Preventive health practices                          |
| Preidis 2011 [54]      | MALAWI                           | 2007-2008  | Hospital (Urban)                   | CO               | Clinical WHO                                           | 11.1-44.6 (IQR) | 51.1 | All severe ALRI<br>All HIV infected or exposed | 16.4                               | 627                                            | SEV                                                                                        |
| Quiambao 1998 [55]     | PHILIPPINES                      | not stated | Hospital (Urban)                   | CO               | Clinical WHO and/or radiological                       | 4-59            |      | Only measles-associated ALRI                   | 17                                 | 182                                            | SEV                                                                                        |
| Quiambao 2009 [56]     | PHILIPPINES                      | 1994-2000  | Hospital (Rural)                   | CO               | Clinical and/or radiological                           | 0-2             | 60.0 |                                                | 14.9                               | 301                                            | A                                                                                          |
| Ramachandran 2012 [57] | INDIA                            | 2006-2008  | Hospital (Urban)                   | CC cohort nested | Clinical WHO and/or radiological                       | 1-59            | 58.0 |                                                |                                    | Cohort: 4375<br>CC: 1071 (357 ca, 714 live co) | S, A, M, Underlying diseases                                                               |
| Rehfuess 2009 [58]     | SUBSAHARAN AFRICA (16 Countries) | 2003       | Community (Urban and rural)        | CO               | Verbal autopsy                                         | 0-59            |      |                                                | 0.7% live births under-5 mortality | 30365                                          | MED, Indoor pollution                                                                      |
| Reyes 1997 [59]        | MEXICO                           | 1992-1993  | Community (Urban and rural)        | CC               | Death certificate and verbal autopsy                   | <12             |      |                                                |                                    | 236 (118 ca, 118 live co)                      | Prematurity, Birth order, BF, MED, Mother's employment, Sanitation, I, Health care factors |
| Rodríguez 2010 [60]    | COLOMBIA                         | 2007-2008  | Four Hospitals (Ward+PICU) (Urban) | CC               | ICD-10 death certificate for ALRI and clinical records | <60             |      |                                                |                                    | 258 (79 ca, 179 live co)                       | A, M, MED, Seasonality, SES, Health care factors                                           |
| Rodríguez 2013 [61]    | COLOMBIA                         | 2009-2011  | Hospital (Urban)                   | CO               | Clinical record and laboratory proven RSV infection    | <36             |      | All RSV ALRI                                   | 1.1                                | 2147                                           | A, Prematurity, Underlying diseases, Previous ALRI, RSV                                    |
| Roth 2005 [62]         | GUINEA - BISSAU                  | 1996-1999  | Community (Urban)                  | CO               | Verbal autopsy                                         | 3-60            | 50.9 |                                                | 2.3                                | 2942                                           | I                                                                                          |

|                                                         |               |           |                                   |    |                                                             |           |      |                  |                        |                         |                                                                            |
|---------------------------------------------------------|---------------|-----------|-----------------------------------|----|-------------------------------------------------------------|-----------|------|------------------|------------------------|-------------------------|----------------------------------------------------------------------------|
| Sehgal 1997 [63]                                        | INDIA         | 1993-1994 | Hospital (Urban)                  | CO | Clinical WHO and/or radiological                            | 0-60      | 58.2 |                  | 10.4                   | 201                     | S, A, M, Underlying diseases, Diarrhoea, I, SEV                            |
| Shah 2012 [64]                                          | ERITREA       | 2006      | PICU (Urban)                      | CO | Clinical and/or radiological                                | <1        |      | All severe ALRI  | 13.7                   | 305                     | S, A, BW, Gestational age, MAG                                             |
| Shann 1989 [65]                                         | PNG           | 1979-1982 | Three Hospitals (Urban and rural) | CO | Clinical                                                    | not given |      | All severe ALRI  | 14.7                   | 748                     | A, M                                                                       |
| Sigauque 2009 [66]                                      | MOZAMBIQUE    | 2004-2006 | Hospital (Rural)                  | CO | Clinical WHO and radiological                               | 0-23      | 58.1 | All severe ALRI  | 11.1                   | 685                     | S, A, M, HIV, Malaria                                                      |
| Smyth 1998 [67] (includes Smyth 1997 [68])              | ZAMBIA        | 1994-1995 | Hospital (Rural)                  | CO | Clinical WHO                                                | 1-59      | 51.3 | All severe ALRI  | 14.6                   | 158                     | A, M, HIV, Malaria                                                         |
| Sutanto 2002 [69]                                       | INDONESIA     | 1998-1999 | Community (Rural)                 | CO | Clinical WHO or verbal autopsy                              | <24       |      |                  | 1.9/100 children-year  | 9210                    | A, Rural/Urban zone                                                        |
| Tupasi 1988[70]                                         | PHILIPPINES   | 1981-1983 | Hospital (Urban)                  | CO | Clinical and radiological                                   | <60       |      |                  | 4.7                    | 729                     | M, SEV                                                                     |
| Tupasi 1990 [71] (includes Tupasi 'Etiology' 1990 [72]) | PHILIPPINES   | 1984-1986 | Hospital (Urban)                  | CO | Clinical WHO                                                | 0-60      | 54   |                  | 16.6                   | 537                     | S, M, Measles                                                              |
| Uriyo 2006 [73]                                         | TANZANIA      | 2003      | Hospital (setting not given)      | CO | Clinical WHO                                                | 2-60      | 62.5 | 50% HIV positive | 12.5                   | 72                      | A, HIV                                                                     |
| Veirum 2005 [74]                                        | GUINEA-BISSAU | 1990-1996 | Hospital (Urban and rural)        | CO | Clinical                                                    | 6-17      |      |                  | 10.6                   | 94                      | I                                                                          |
| Vejar 2000 [75]                                         | CHILE         | 1990-1994 | Community (Urban)                 | CC | Autopsy                                                     | 1-59      |      |                  |                        | 141 (53 ca, 88 live co) | BW, M, BF, Underlying diseases, Previous ALRI, MAG, MED, Second-hand smoke |
| Victoria 1987 [76]                                      | BRAZIL        | 1982-1984 | Community (Urban)                 | CO | Hospital record, death certificate, autopsy, verbal autopsy | <12       |      |                  | 0.45/100 children-year | 4931                    | BW                                                                         |

|                                                     |              |           |                                    |    |                                                                    |            |      |                            |                          |                                                                                                                               |          |
|-----------------------------------------------------|--------------|-----------|------------------------------------|----|--------------------------------------------------------------------|------------|------|----------------------------|--------------------------|-------------------------------------------------------------------------------------------------------------------------------|----------|
| Victoria 1989 [77]<br>(includes Victoria 1988 [78]) | BRAZIL       | 1984-1985 | Community (Urban)                  | CC | Hospital record, ICD-10 death certificate, autopsy, verbal autopsy | 0-12       | 52.9 |                            | 381(127 ca, 254 live co) | S, Birth order, BW, M, BF, MAG, MED, Mother's employment, SES, Sanitation, CW, Second-hand smoke, Preventive health practices |          |
| Weissenbacher 1990 [79]                             | ARGENTINA    | 1984-1987 | Three Hospitals (Urban)            | CO | Clinical                                                           | 0-60       | 55.8 | 3.8                        | 805                      | S, A, M, I                                                                                                                    |          |
| Ye 2009 [80]                                        | KENYA        | 2003-2005 | Community (Urban)                  | CO | Verbal autopsy                                                     | <60        |      | 2.0/100 children-year      | 17787                    | A, Seasonality                                                                                                                |          |
| Yoon 1997 [81]<br>(includes Yoon 1996 [82])         | PHILIPPINES  | 1988-1991 | Community (Urban and rural)        | CO | Verbal autopsy                                                     | <24        |      | ALRI or ALRI and diarrhoea | -                        | 9942                                                                                                                          | M, BF    |
| Zar 2001 [83]                                       | SOUTH AFRICA | 1998      | Four Hospitals (Ward+PICU) (Urban) | CO | Clinical WHO                                                       | 3-16 (IQR) | 57.2 | 60% HIV positive           | 15.6                     | 250                                                                                                                           | HIV, PcP |

+ Case fatality rate (%) in hospital studies; mortality (% children per year or % live births) in cohort community studies.

Abbreviations: A=age; BF=breastfeeding; BW= birth weight; CW=crowding; DRC= Democratic Republic of Congo; I= immunization; IQR= Interquartile Range; M=malnutrition; MAG=maternal age; MED=maternal education; PcP= Pneumocystis carinii (jirovecii); PICU=Pediatric Intensive Care Unit; PNG= Papua New Guinea; S=sex; SES= socioeconomic status; SEV= severity; Underlying diseases=chronic diseases including congenital heart diseases; WHO= World Health Organisation.
