# Supplementary material for: Risk Factors for Mortality from Acute Lower Respiratory Infections (ALRI) in Children under Five Years of Age in Low and Middle-Income Countries: A Systematic Review and Meta-Analysis of Observational Studies
Source: PubMed Central journal article supplement (PMC4312071; doi:10.1371/journal.pone.0116380), 2015-01-30
Supplement: pone.0116380.s005.pdf [file pone.0116380.s005.pdf]

**Table S2: appraisal of the risk of bias of the included studies**

| <b>AUTHOR</b>            | <b>1. Study participation</b> | <b>2. Study Attrition</b> | <b>3.Risk factors measurement</b> | <b>4. Outcome measurement</b> | <b>5. Study confounding</b> | <b>6. Statistical analysis</b> | <b>Overall risk of bias</b> |
|--------------------------|-------------------------------|---------------------------|-----------------------------------|-------------------------------|-----------------------------|--------------------------------|-----------------------------|
| Agrawal 1995             |                               |                           |                                   |                               |                             |                                |                             |
| Arifeen 2001             |                               |                           |                                   |                               |                             |                                | HIGH                        |
| Ayeko 2012               |                               |                           |                                   |                               |                             |                                |                             |
| Bachmann 1996            |                               |                           |                                   |                               |                             |                                | HIGH                        |
| Bahl 2005                |                               |                           |                                   |                               |                             |                                |                             |
| Bahwere 2004             |                               |                           |                                   |                               |                             |                                | HIGH                        |
| Banajee 1997             |                               |                           |                                   |                               |                             |                                |                             |
| Banajee 1998             |                               |                           |                                   |                               |                             |                                | HIGH                        |
| Berkley 2010             |                               |                           |                                   |                               |                             |                                |                             |
| Chisti 2011              |                               |                           |                                   |                               |                             |                                |                             |
| Chisti 2013              |                               |                           |                                   |                               |                             |                                |                             |
| Collings 1985            |                               |                           |                                   |                               |                             |                                | HIGH                        |
| Cotes 2011               |                               |                           |                                   |                               |                             |                                | HIGH                        |
| De Francisco 1993        |                               |                           |                                   |                               |                             |                                | HIGH                        |
| Deivanayagam 1992        |                               |                           |                                   |                               |                             |                                | HIGH                        |
| Delpont 2002             |                               |                           |                                   |                               |                             |                                |                             |
| Demers 2000              |                               |                           |                                   |                               |                             |                                |                             |
| Djelantik 2003           |                               |                           |                                   |                               |                             |                                | HIGH                        |
| Duke 2001                |                               |                           |                                   |                               |                             |                                |                             |
| El Kohli 2013            |                               |                           |                                   |                               |                             |                                |                             |
| Espinal 1996             |                               |                           |                                   |                               |                             |                                | HIGH                        |
| Fagbule 1990             |                               |                           |                                   |                               |                             |                                | HIGH                        |
| Ferreira 2013            |                               |                           |                                   |                               |                             |                                |                             |
| Ghani 2012               |                               |                           |                                   |                               |                             |                                |                             |
| Graham 2000              |                               |                           |                                   |                               |                             |                                |                             |
| Graham 2011*             |                               |                           |                                   |                               |                             |                                |                             |
| Hildenwall 2009          |                               |                           |                                   |                               |                             |                                |                             |
| Hoque 1999               |                               |                           |                                   |                               |                             |                                |                             |
| Hussain 1999             |                               |                           |                                   |                               |                             |                                | HIGH                        |
| Johnson 1992**           |                               |                           |                                   |                               |                             |                                | HIGH                        |
| Johnson 2008             |                               |                           |                                   |                               |                             |                                |                             |
| Kitchin 2011             |                               |                           |                                   |                               |                             |                                | HIGH                        |
| Lehman 1996              |                               |                           |                                   |                               |                             |                                | HIGH                        |
| Lupisan 2007             |                               |                           |                                   |                               |                             |                                |                             |
| Madhi 2000               |                               |                           |                                   |                               |                             |                                |                             |
| Man 1998                 |                               |                           |                                   |                               |                             |                                | HIGH                        |
| Mathur 2002              |                               |                           |                                   |                               |                             |                                | HIGH                        |
| McNally 2007             |                               |                           |                                   |                               |                             |                                |                             |
| Millán 1999              |                               |                           |                                   |                               |                             |                                | HIGH                        |
| Morrow 2010              |                               |                           |                                   |                               |                             |                                |                             |
| Mtango 1992              |                               |                           |                                   |                               |                             |                                | HIGH                        |
| Murtagh 2009             |                               |                           |                                   |                               |                             |                                | HIGH                        |
| Naheed 2009              |                               |                           |                                   |                               |                             |                                | HIGH                        |
| Nantanda 2008            |                               |                           |                                   |                               |                             |                                |                             |
| Nascimento-Carvalho 2002 |                               |                           |                                   |                               |                             |                                |                             |
| Nathoo 1993              |                               |                           |                                   |                               |                             |                                |                             |
| Niobey 1992              |                               |                           |                                   |                               |                             |                                | HIGH                        |
| O'Callaghan-Gordo 2011   |                               |                           |                                   |                               |                             |                                |                             |
| Onyango 1993             |                               |                           |                                   |                               |                             |                                | HIGH                        |
| Perez 2007               |                               |                           |                                   |                               |                             |                                | HIGH                        |
| Preidis 2011             |                               |                           |                                   |                               |                             |                                |                             |
| Post 1992                |                               |                           |                                   |                               |                             |                                | HIGH                        |

|                    |        |        |        |        |        |        |      |
|--------------------|--------|--------|--------|--------|--------|--------|------|
| Quiambao 1998      | Red    | Green  | Yellow | Green  | Red    | Red    | HIGH |
| Quiambao 2009      | Yellow | Green  | Green  | Green  | Green  | Yellow |      |
| Ramachandra 2012   | Green  | Green  | Yellow | Green  | Yellow | Yellow |      |
| Rehfuess 2009      | Yellow | Green  | Green  | Red    | Yellow | Green  | HIGH |
| Reyes 1997         | Yellow | White  | Green  | Green  | Yellow | Yellow | HIGH |
| Rodríguez 2010     | White  | Green  | Green  | Green  | Yellow | Yellow | HIGH |
| Rodríguez 2013     | Green  | Green  | Green  | Green  | Green  | Yellow |      |
| Roth 2005          | Green  | Yellow | Green  | Red    | Yellow | Green  |      |
| Shah 2012          | White  | Green  | Yellow | Green  | Green  | Yellow |      |
| Sehgal 1997        | White  | Green  | Green  | Yellow | Green  | Red    |      |
| Shann 1989         | Yellow | Green  | Yellow | Green  | Red    | Yellow | HIGH |
| Sigauque 2009      | Green  | Green  | Yellow | Green  | Yellow | Yellow |      |
| Smyth 1998***      | Yellow | Green  | Yellow | Green  | Yellow | Yellow | HIGH |
| Sutanto 2002       | Yellow | White  | Green  | Green  | Red    | Yellow |      |
| Tupasi 1988        | Yellow | White  | Yellow | Green  | Yellow | Yellow | HIGH |
| Tupasi 1990****    | Yellow | Green  | Green  | Green  | Green  | Yellow |      |
| Uriyo 2006         | Yellow | Yellow | Yellow | Green  | Red    | Yellow | HIGH |
| Veirum 2004        | Red    | Green  | Green  | Yellow | Red    | Red    | HIGH |
| Vejar 2000         | Yellow | Green  | Yellow | Green  | Red    | Yellow | HIGH |
| Victoria 1987      | Green  | Green  | Green  | Yellow | Red    | Yellow |      |
| Victoria 1988***** | Green  | Green  | Yellow | Yellow | Green  | Green  |      |
| Weissenbacher 1990 | Green  | Green  | Yellow | Red    | Red    | Yellow | HIGH |
| Ye 2009            | Green  | Green  | Green  | Yellow | Yellow | Green  |      |
| Yoon 1997*****     | Green  | Green  | Green  | Yellow | Green  | Yellow |      |
| Zar 2001           | Yellow | Green  | Green  | Green  | Yellow | Yellow |      |

\* includes Ramakrishna 2012

\*\* includes Johnson “Host factors” 1992

\*\*\* includes Smyth 1997

\*\*\*\* includes Tupasi “Etiology” 1990

\*\*\*\*\* includes Victoria 1988

\*\*\*\*\* includes Yoon 1996

|        | Rating of the risk of bias in the domain |
|--------|------------------------------------------|
| Green  | Low                                      |
| Yellow | Moderate                                 |
| Red    | High                                     |
| White  | Unknown                                  |
