# Supplementary material for: Risk Factors for Mortality from Acute Lower Respiratory Infections (ALRI) in Children under Five Years of Age in Low and Middle-Income Countries: A Systematic Review and Meta-Analysis of Observational Studies
Source: PubMed Central journal article supplement (PMC4312071; doi:10.1371/journal.pone.0116380), 2015-01-30
Supplement: pone.0116380.s006.pdf [file pone.0116380.s006.pdf]

**S3 Table. Subgroup analysis and random effect metaregression analysis for ALRI definition and HIV setting**

| Risk factors                                         | Comparisons                                            | ALRI DEFINITION |                     |                    |                   |                      |                    |       | p from meta-regression |
|------------------------------------------------------|--------------------------------------------------------|-----------------|---------------------|--------------------|-------------------|----------------------|--------------------|-------|------------------------|
|                                                      |                                                        | WHO DEFINITION  |                     |                    | OTHER DEFINITIONS |                      |                    |       |                        |
|                                                      |                                                        | N° of studies   | Pooled OR           | I <sup>2</sup> (%) | N° of studies     | Pooled OR            | I <sup>2</sup> (%) |       |                        |
| Age                                                  | Age < 1y vs > 1y                                       | 9               | 2.49 (1.78 - 3.49)  | 50.6               | 18                | 1.92 (1.33 - 2.77)   | 81.5               | 0.295 |                        |
| Female sex                                           | Female vs male                                         | 4               | 1.22 (0.95 - 1.58)  | 51.9               | 19                | 1.14 (1.00 - 1.30)   | 3.6                | 0.782 |                        |
| Low birth weight                                     | <2500g vs >2500                                        | 2               | 1.95 (0.96 - 3.97)  | 51.7               | 7                 | 3.10 (2.20 - 4.36)   | 30.5               | 0.195 |                        |
| Malnutrition                                         | Severe malnutrition vs non-malnourished                | 5               | 5.06 (3.31 - 7.75)  | 53.3               | 16                | 3.99 (3.15 - 5.06)   | 38.1               | 0.205 |                        |
|                                                      | Moderate malnutrition vs non-malnourished              | 5               | 1.62 (1.01 - 2.59)  | 56.1               | 13                | 2.89 (2.14 - 3.90)   | 63.0               | 0.081 |                        |
| HIV/AIDS                                             | Yes vs No                                              | 7               | 3.85 (2.82 - 5.26)  | 0.0                | 7                 | 5.93 (4.21 - 8.36)   | 0.0                | 0.068 |                        |
| Diarrhoea/dehydration                                | Yes vs No                                              | 3               | 1.89 (1.44 - 2.47)  | 0.0                | 3                 | 4.56 (2.67 - 7.78)   | 26.9               | 0.001 |                        |
| Respiratory Syncytial Virus                          | Yes vs No                                              | 2               | 0.43 (0.14 - 1.26)  | 51.0               | 4                 | 0.36 (0.16 - 0.80)   | 0.0                | 0.448 |                        |
| Severity of pneumonia as for WHO clinical definition | Severe pneumonia vs pneumonia                          | 4               | 3.21 (2.15 - 4.78)  | 12.5               | 2                 | 8.23 (1.09 - 62.30)  | 0.0                | 0.359 |                        |
|                                                      | Very severe pneumonia vs severe pneumonia or pneumonia | 7               | 9.43 (5.91 - 15.04) | 59.8               | 5                 | 10.06 (4.19 - 24.16) | 25.7               | 0.966 |                        |

  

| Risk factors          | Comparisons                               | HIV SETTING     |                     |                    |                  |                    |                    |       | p from meta-regression |
|-----------------------|-------------------------------------------|-----------------|---------------------|--------------------|------------------|--------------------|--------------------|-------|------------------------|
|                       |                                           | LOW HIV SETTING |                     |                    | HIGH HIV SETTING |                    |                    |       |                        |
|                       |                                           | N° of studies   | Pooled OR           | I <sup>2</sup> (%) | N° of studies    | Pooled OR          | I <sup>2</sup> (%) |       |                        |
| Age                   | Age < 1y vs > 1y                          | 11              | 2.47 (1.40 - 4.34)  | 89.4               | 11               | 2.85 (1.76 - 4.62) | 81.4               | 0.679 |                        |
| Female sex            | Female vs male                            | 13              | 1.08 (0.95 - 1.22)  | 0.0                | 5                | 1.22 (1.00 - 1.49) | 0.0                | 0.296 |                        |
| Low birth weight      | <2500g vs >2500                           | 4               | 3.09 (2.09 - 4.56)  | 0.0                | 2                | 1.95 (0.96 - 3.97) | 51.7               | 0.183 |                        |
| Malnutrition          | Severe malnutrition vs non-malnourished   | 11              | 4.16 (3.46 - 5.00)  | 0.0                | 5                | 3.91 (2.21 - 6.92) | 73.8               | 0.535 |                        |
|                       | Moderate malnutrition vs non-malnourished | 5               | 2.62 (1.69 - 4.07)  | 65.8               | 5                | 1.53 (0.97 - 2.39) | 59.6               | 0.097 |                        |
| Diarrhoea/dehydration | Yes vs No                                 | 2               | 5.77 (2.35 - 14.17) | 40.2               | 4                | 2.24 (1.53 - 3.26) | 40.2               | 0.037 |                        |

|                                                      |                                                        |   |                      |      |   |                     |      |       |
|------------------------------------------------------|--------------------------------------------------------|---|----------------------|------|---|---------------------|------|-------|
| Seasonality                                          | Wet vs dry season                                      | 2 | 1.22 (0.46 - 3.23)   | 78.9 | 2 | 0.84 (0.59 - 1.20)  | 0.0  | 0.624 |
| Respiratory Syncytial Virus                          | Yes vs No                                              | 3 | 0.56 (0.32 - 0.99)   | 0.0  | 3 | 0.29 (0.12 - 0.68)  | 0.0  | 0.200 |
| Severity of pneumonia as for WHO clinical definition | Severe pneumonia vs pneumonia                          | 3 | 3.14 (2.06 - 4.80)   | 0.0  | 2 | 5.25 (0.87 - 31.81) | 50.2 | 0.882 |
|                                                      | Very severe pneumonia vs severe pneumonia or pneumonia | 4 | 12.43 (5.43 - 28.48) | 70.9 | 6 | 7.79 (5.09 - 11.92) | 26.7 | 0.379 |
